# Supplementary material for: Blocking of the CXCR4-CXCL12 Interaction Inhibits the Migration of Chicken B Cells Into the Bursa of Fabricius
Source: PubMed Central journal article supplement (PMC6967738; doi:10.3389/fimmu.2019.03057), 2020-01-10
Supplement: Table_1.pdf [file Table_1.pdf]

| <b>Nr. of primer</b> | <b>Direction</b> | <b>Sequence</b>           | <b>Amplification length (bp)</b> |
|----------------------|------------------|---------------------------|----------------------------------|
| 455 CXCR4            | Forward          | ctgtggctgacctcctcttg      | 86                               |
| 456 CXCR4            | Reverse          | acacaggacattccgaagtacc    | 86                               |
| 457 CXCL12           | Forward          | ctcaagagcaacagcaagcaa     | 150                              |
| 458 CXCL12           | Reverse          | gcccttaacgttctaccctga     | 150                              |
| 322 18S              | Forward          | catgtctaagtacacacggcggtta | 25                               |
| 323 18S              | Reverse          | ggcgtgctggcatggtatta      | 20                               |
